# Supplementary material for: Rapid immunoassay for dual-mode detection of HPV16 and HPV18 DNA based on Au@PdPt nanoparticles
Source: Royal Society of Chemistry journal article supplement (doi:10.1039/d3ay02307a), 2024-01-01
Supplement: d3ay02307a1.pdf [file d3ay02307a1.pdf]

## Supporting Information

**A rapid immunoassay for dual-mode detection of HPV16 and HPV18 DNA**

**based on Au@PdPt nanoparticles**

Huanxin Xiao;<sup>a</sup> Weiguang Chen;<sup>a</sup> Mingxia Lin;<sup>a</sup> Shilin Jiang;<sup>a</sup> Xiping Cui<sup>a,\*</sup> and

Suqing Zhao<sup>a,\*</sup>

*<sup>a</sup> Department of Pharmaceutical Engineering, School of Biomedical and Pharmaceutical Sciences, Guangdong University of Technology, Guangzhou 510006, People's Republic of China*

\*Corresponding Author:

Prof. Suqing Zhao

Tel.: +86 15820258676

E-mail address: [sqzhao@gdut.edu.cn](mailto:sqzhao@gdut.edu.cn) (S.-Q. Zhao)

Dr. Xiping Cui

Tel.: +86 18813758818

E-mail address: [cuxiping1989@163.com](mailto:cuxiping1989@163.com) (X.-P. Cui)

E-mail addresses for other authors:

[hxq323723@163.com](mailto:hxq323723@163.com) (H.-X. Xiao); [weiguangchen2023@163.com](mailto:weiguangchen2023@163.com);

[lmxmingxia@163.com](mailto:lmxmingxia@163.com) (M.-X. Lin); [jiangshilin\\_22@163.com](mailto:jiangshilin_22@163.com) (S.-L. Jiang).

## Figure and table captions

**Table. S1** Sequence of standard DNA-RNA hybrid and RNA probe

| Names                      | Sequences                                 |                                                    |
|----------------------------|-------------------------------------------|----------------------------------------------------|
|                            | sense (5'-3') DNA                         | antisense (5'-3') RNA                              |
| HPV16 RNA probe            | /                                         | Digoxin-<br>CGACCCCUUAUUAUGGAAU<br>CUUUGCUIUUUGUCC |
| HPV18 RNA probe            | /                                         | Biotin-<br>CUAUACACCACAAUAAAUCU<br>UUAAAUGCA       |
| HPV 16 DNA-<br>RNA-digoxin | GGACAAAAAGCAAAGATTCC<br>ATAATATAAGGGGTCCG | Digoxin-<br>CGACCCCUUAUUAUGGAAU<br>CUUUGCUIUUUGUCC |
| HPV18 DNA-RNA-<br>biotin   | TGCATTAAAGATTTATTTGT<br>GGTGTATAG         | Biotin-<br>CUAUACACCACAAUAAAUCU<br>UUAAAUGCA       |

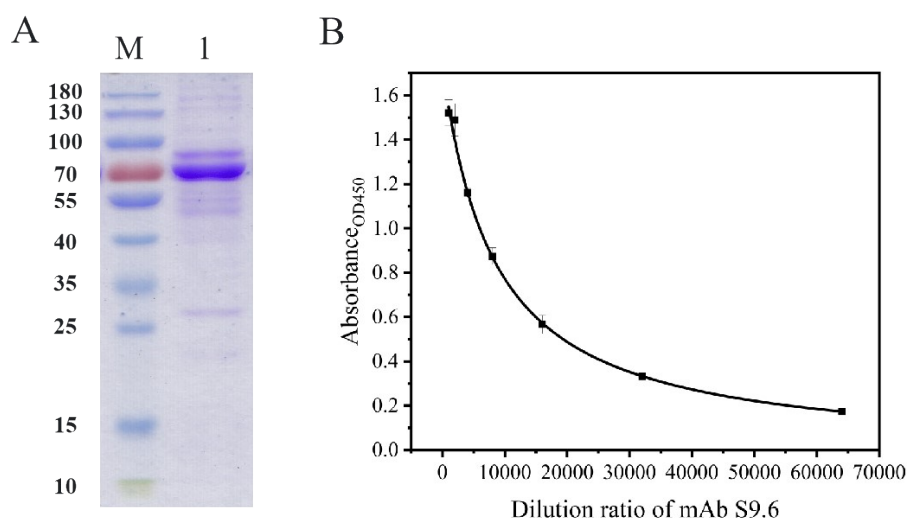

**Fig. S1** Characterization of mAb S9.6. (A) SDS-PAGE char-acterization of mAb S9.6: M. Marker; lane 1. mAb S9.6; (B) ELISA characterization of mAb S9.6 Titer.

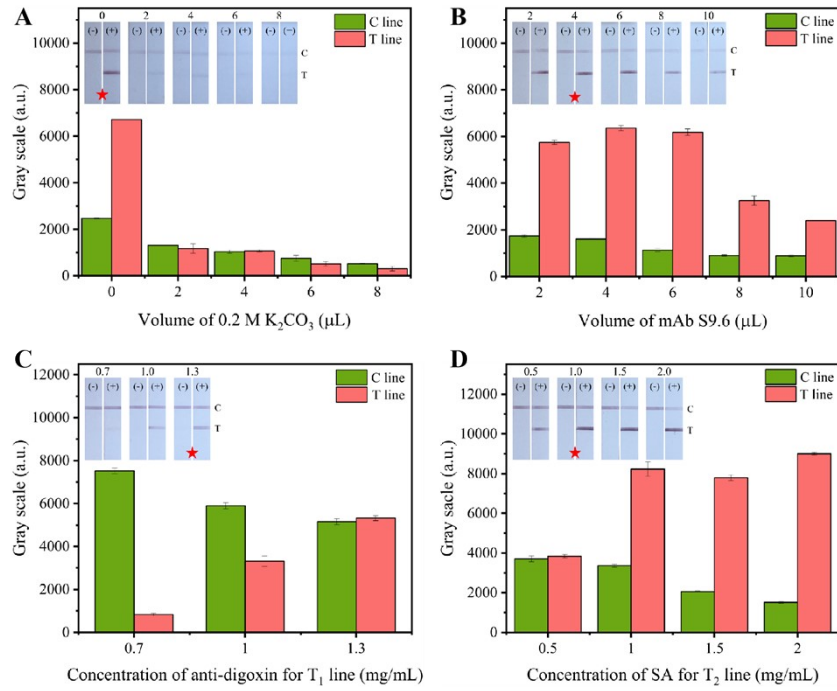

**Fig. S2** Optimization of the AuNPs-LFIA. (A) Optimized volume of 0.2 M  $K_2CO_3$  in the synthesis of AuNPs-mAb probe; (B) Optimized amount of mAb S9.6 in the synthesis of AuNPs-mAb probe; (C) Optimized concentration of  $T_1$  line; (D) Optimized concentration of  $T_2$  line.

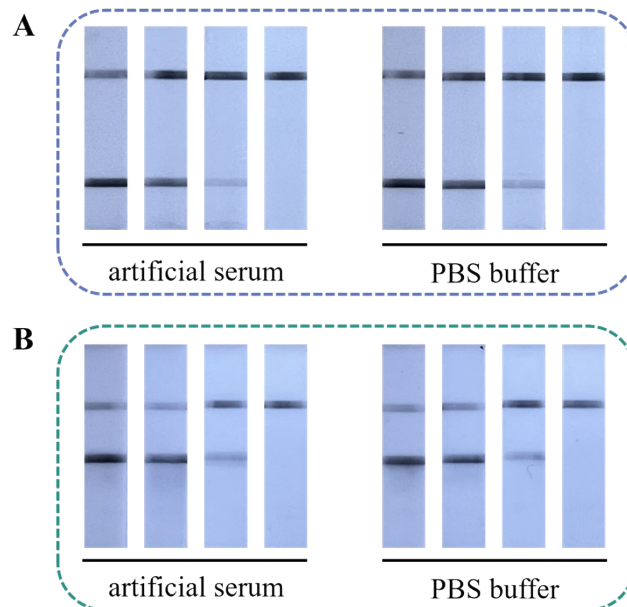

**Fig. S3** Detection of HPV 16 DNA-RNA-digoxin (A) and HPV 18 DNA-RNA-biotin (B) in artificial serum and PBS buffer by Au@PdPt-LFIA.

**Table. S2** Comparison with other studies of HPV detection

| Method                                                                         | Genotype | LOD                          | Assay duration | Reference |
|--------------------------------------------------------------------------------|----------|------------------------------|----------------|-----------|
| CuO-based LFSB <sup>a</sup>                                                    | 16       | 1 nM                         | <20 min        | 1         |
| ELISA <sup>b</sup>                                                             | 16 E6/E7 | 0.92/0.42 pg/mL              | >300 min       | 2         |
| CRISPR/Cas12a based LFB <sup>c</sup>                                           | 16/18    | 0.9 copies/ $\mu$ L          | ~50 min        | 3         |
| LAMP-LFD <sup>d</sup>                                                          | 16/18    | 10/1<br>copies/reaction      | 45 min         | 4         |
| tailed primer isothermal<br>amplification and lateral flow<br>detection assays | 16/18/45 | 50/50/500<br>copies/reaction | <35 min        | 5         |
| electrochemical DNA biosensor                                                  | 16       | 0.23 copies/ $\mu$ L         | 75 min         | 6         |
| MCLSA <sup>e</sup>                                                             | 16       | 54 copies/tube               | 45 min         | 7         |
| electrochemical resistive DNA<br>biosensor                                     | 16       | 2.39 nM                      | >120 min       | 8         |
| microchip electrophoresis                                                      | 16/18    | 10 <sup>2</sup> cells/mL     | >130 min       | 9         |
| WarmStart colorimetric LAMP <sup>f</sup>                                       | 16/18    | 100/10<br>copies/reaction    | >80 min        | 10        |
| PEC based on SiW12@CdS<br>QDs <sup>g</sup>                                     | 16       | 0.8 nM                       | >120 min       | 11        |
| DNA sandwich hybridization<br>with AuNP probe                                  | 16/18    | 0.14 nM                      | >20 min        | 12        |
| Paper-based colorimetric assay                                                 | 16       | 1 nM                         | >30 min        | 13        |
| AuNPs-LFIA <sup>h</sup>                                                        | 16/18    | 0.23/0.20 nM                 | <15 min        | This work |
| Au@PdPt-LFIA                                                                   | 16/18    | 0.05/0.02 nM                 | <15 min        | This work |

(a) LFSB: lateral flow strip biosensor; (b) ELISA: enzyme-linked immunosorbent assay; (c) LFB: lateral flow biosensor; (d) LFD: lateral flow dipstick; (e) MCLSA: multiple cross-linking spiral amplification; (f) LAMP: loop-mediated isothermal amplification; (g) QDs: quantum dots; (h) LFIA: lateral flow immunoassay.

## References

- 1 Z. Yang, C. Yi, S. Lv, Y. Sheng, W. Wen, X. Zhang and S. Wang, *Sensors and Actuators B: Chemical*, 2019, **285**, 326-332.
- 2 S. Ding, S. Y. Qian, Y. Zhang, W. Wu, G. Lu, Y. Lu, X. Feng, L. Li and P. Shen, *Scientific reports*, 2015, **5**, 13686.
- 3 O. Mukama, T. Yuan, Z. He, Z. Li, J. d. D. Habimana, M. Hussain, W. Li, Z. Yi, Q. Liang and L. Zeng, *Sensors and Actuators B: Chemical*, 2020, **316**, 128119.
- 4 R. Kumvongpin, P. Jearanaikoon, C. Wilailuckana, N. Sae-Ung, P. Prasongdee, S. Daduang, M. Wongsena, P. Boonsiri, W. Kiatpathomchai, S. S. Swangvaree, A. Sandee and J. Daduang, *Mol Med Rep*, 2017, **15**, 3203-3209.
- 5 M. M. Chang, A. Ma, E. N. Novak, M. Barra, K. A. Kundrod, J. R. Montealegre, M. E. Scheurer, P. E. Castle, K. Schmeler and R. Richards-Kortum, *Scientific reports*, 2023, **13**, 20397.
- 6 P. Nakowong, P. Chatchawal, T. Chaibun, N. Boonapatcharoen, C. Promptmas, W. Buajeeb, S. Y. Lee, P. Jearanaikoon and B. Lertanantawong, *Talanta*, 2024, **269**, 125495.
- 7 D. Zhang, D. Liu, B. Liu and X. Ma, *Journal of microbiology and biotechnology*, 2021, **31**, 610-620.
- 8 J. R. Espinosa, M. Galván, A. S. Quiñones, J. L. Ayala, V. Ávila and S. M. Durón, *Molecules (Basel, Switzerland)*, 2021, **26**.
- 9 Z. Fan, X. Feng, W. Zhang, X. Zhang and J.-M. Lin, *Journal of Pharmaceutical Analysis*, 2020, **10**, 329-333.
- 10 M. Daskou, D. Tsakogiannis, T. G. Dimitriou, G. D. Amoutzias, D. Mossialos, C. Kottaridi, C. Gartzonika and P. Markoulatos, *Journal of virological methods*, 2019, **270**, 87-94.
- 11 Y. Cheng, C. Sun, Y. Chang, J. Wu, Z. Zhang, Y. Liu, S. Ge, Z. Li, X. Li, L. Sun and D. Zang, *Frontiers in bioengineering and biotechnology*, 2023, **11**, 1193052.
- 12 S. H. Chen, K. I. Lin, C. Y. Tang, S. L. Peng, Y. C. Chuang, Y. R. Lin, J. P. Wang and C. S. Lin, *IEEE transactions on nanobioscience*, 2009, **8**, 120-131.
- 13 S. Naorungroj, P. Teengam, T. Vilaivan and O. Chailapakul, *New Journal of Chemistry*, 2021, **45**, 6960-6967.
